RESEARCH ARTICLE

# Cr(VI) Adsorption on Red Mud Modified by Lanthanum: Performance, Kinetics and Mechanisms

You-Wei Cui<sup>1\*</sup>, Jie Li<sup>1</sup>, Zhao-Fu Du<sup>2</sup>, Yong-Zhen Peng<sup>1</sup>

**1** Beijing University of Technology, College of Energy and Environmental Engineering, Chaoyang District, Beijing, China, **2** Central Iron and Steel Research Institute, Haidian District, Beijing, China

\* [cyw@bjut.edu.cn](mailto:cyw@bjut.edu.cn)

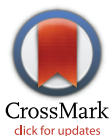

**OPEN ACCESS**

**Citation:** Cui Y-W, Li J, Du Z-F, Peng Y-Z (2016) Cr(VI) Adsorption on Red Mud Modified by Lanthanum: Performance, Kinetics and Mechanisms. PLoS ONE 11(9): e0161780. doi:10.1371/journal.pone.0161780

**Editor:** G Yang, Southwest University, CHINA

**Received:** May 1, 2016

**Accepted:** August 11, 2016

**Published:** September 22, 2016

**Copyright:** © 2016 Cui et al. This is an open access article distributed under the terms of the [Creative Commons Attribution License](https://creativecommons.org/licenses/by/4.0/), which permits unrestricted use, distribution, and reproduction in any medium, provided the original author and source are credited.

**Data Availability Statement:** All relevant data are within the paper and its Supporting Information files.

**Funding:** This research was supported by the National Natural Science Foundation of China (Project No. 51478011 and No. 51178004), the Beijing Natural Science Foundation (Project No. 8132013). The funders had no role in study design, data collection and analysis, decision to publish, or preparation of the manuscript.

**Competing Interests:** The authors have declared that no competing interests exist.

**Abbreviations:**  $q_e$ , Quantity of Cr(VI) adsorbed at equilibrium mg/g;  $C_i$ , Initial Cr(VI) concentration mg/L;  $C_e$ , Final Cr(VI) concentration mg/L;  $V$ , Volume of the

## Abstract

Water pollution caused by the highly toxic metal hexavalent chromium (Cr(VI)) creates significant human health and ecological risks. In this study, a novel adsorbent was used to treat Cr(VI)-containing wastewater; the adsorbent was prepared using red mud (RM) generated from the alumina production industry and the rare earth element lanthanum. This study explored adsorption performance, kinetics, and mechanisms. Results showed that the adsorption kinetics of the RM modified by lanthanum (La-RM), followed the pseudo-second-order model, with a rapid adsorption rate. Cr(VI) adsorption was positively associated with the adsorbent dose, pH, temperature, and initial Cr(VI) concentration; coexisting anions had little impact. The maximum Cr(VI) adsorption capacity was 17.35 mg/g. Cr(VI) adsorption on La-RM was a mono-layer adsorption pattern, following the Langmuir isotherm model. Thermodynamic parameters showed the adsorption was spontaneous and endothermic. The adsorption of Cr(VI) on La-RM occurred as a result of LaOCl formation on the RM surface, which in turn further reacted with Cr(VI) in the wastewater. This study highlighted a method for converting industrial waste into a valuable material for wastewater treatment. The novel adsorbent could be used as a potential adsorbent for treating Cr(VI)-contaminating wastewater, due to its cost-effectiveness and high adsorption capability.

## Introduction

Rapid economic development has created significant environmental pollution in China, with heavy metal pollution becoming one of the most significant problems. Hexavalent chromium (Cr(VI)), a typical heavy metal, is one of the 25 most hazardous substances in the priority list of hazardous substances [1]. Cr(VI)-contaminated wastewater is generated in large volumes by many industries, such as leather tanning, plating, electroplating, anodizing baths, rinse waters, and other industrial activities [2]. Survey data indicate there are more than 10,000 electroplating factories in China, collectively discharging more than 4 billion cubic meters of Cr-contaminated wastewater annually [3]. Cr(VI) has a wide range of adverse impacts on plants, animals, and humans. Cr(VI) toxicity can lead to the function failure of liver, lung, kidney, and liver

Cr(VI) L;  $M$ , Mass of La-RM g;  $q_t$ , Quantity of Cr(VI) adsorbed over a given time mg/g;  $t$ , Contact time min;  $k_1$ , Adsorption rate constants for the pseudo-first-order kinetic model 1/min;  $k_2$ , Adsorption rate constants for the pseudo-second-order kinetic model g/(mg·min);  $K_L$ , Constant of Langmuir model L/mg;  $q_m$ , Mono-layer adsorption capacity of La-RM mg/g;  $K_F$ , Constant of Freundlich model L/g;  $n$ , Heterogeneity factor of Freundlich model;  $\Delta G^\circ$ , Gibbs free energy KJ/mol;  $\Delta H^\circ$ , enthalpy KJ/mol;  $\Delta S^\circ$ , entropy J/mol;  $R$ , The ideal gas constant (8.314J mol<sup>-1</sup>K<sup>-1</sup>);  $T$ , Temperature K;  $K$ , Sorption equilibrium constant;  $D$ , Grain size nm;  $B$ , Broadening of diffraction line measured at half its maximum intensity;  $\lambda$ , Wavelength of X-ray;  $\theta$ , Bragg angle;  $R^2$ , Regression coefficient.

organ, as well as gastric damage in humans, even at low concentrations [4]. Therefore, the U.S. environmental protection agency (EPA) has set the strict limits on Cr(VI) effluent levels, with less than 0.05 mg/L allowed in drinking water.

Many techniques, including of chemical precipitation, membrane filtration, adsorption, ion exchange, electro dialysis, and biological methods, have been explored for their ability to remove Cr(VI) from the contaminated water [5–7]. Among these techniques, adsorption has attracted many interests because of its effectiveness in advanced wastewater treatment processes. It has the advantages of being a simple process, with a low amount of toxic sludge production [8, 9]. Adsorbent is considered to be the most important for an adsorption technology, because it directly influences adsorption capacity and treatment cost. Developing adsorbents with high absorption capacity and low cost is the significant research interest in the environmental materials field.

Some industrial wastes may be reused as low-cost absorbent materials, due to their cost-effectiveness, large volumes, and availability. Red mud (RM) is made of highly alkaline bauxite residues from aluminum production. Approximately one to two tonnes (dry weight) of RM are generated for every ton of aluminum produced [10]. RM disposal costs account for approximately 5% of aluminum production [11]; these high costs increase financial burden and lead to great waste accumulation. The accumulation of these high alkaline solids leads to significant environmental pollution, including surface water, groundwater, soil, and even atmospheric pollution. Due to the potential environmental risks, RM is listed as a hazardous solid waste in China.

To promote the recycle and reuse of industrial solid waste, researches have focused on the value-added use of RM. Most recently, RM has been applied as an adsorbent to remove pollutants from water. When RM is treated properly with acid, heat, redox, or other methods, it has the capacity to adsorb phosphorus, fluoride, heavy metals, and even some organics from wastewater [12–17]. However, few research has been done on the adsorption of Cr(VI) by RM from wastewater. One study found that RM presented a removal capacity of 0.015 mg/g Cr(VI) from wastewater after it was treated by a combination of acid and heat [18]. Although this study showed that adsorption of Cr(VI) could be achieved by RM, the adsorption capacity needed to enhance.

Lanthanum (La) is a typical rare earth element, defined by the international union of pure and applied chemistry (IUPAC) as a set of seventeen chemical elements in the periodic table with similar characteristics as highly active metals. Research suggests that some adsorbents activated by lanthanum experience a significant improvement in adsorption capacity. For example, the phosphate adsorption capacity of La(OH)<sub>3</sub>-modified exfoliated vermiculite (EV) was approximately one order of magnitude higher than the capacity of EV alone [19]. Lanthanum chitosan adsorbents remove fluoride from water effectively, exceeding the adsorption rates of bare chitosan and chitin [20]. Lanthanum is one of the most abundant rare earth. Due to its high reserves and limited uses, La currently has a low price compared with other rare earth in China. As such, increasing its application value would increase its trading price.

In this study, we prepared a novel adsorbent by modifying industrial waste RM using La (this material is referred to La-RM). We then evaluated its performance and kinetics in removing Cr(VI) from aqueous media. The influence of several key parameters and the competitive effects of common co-existing ions were investigated using batch experiments. Emphasis was placed on the adsorption mechanism, by establishing the thermodynamics, the adsorption isotherm, and the adsorption reaction.

## Materials and Methods

### La-RM Preparation

The RM used in the study was collected from Shandong aluminum corporation, China. The main chemical composition of RM included:  $\text{Al}_2\text{O}_3$  (27.16%),  $\text{SiO}_2$  (26.70%),  $\text{CaO}$  (24.68%),  $\text{TiO}_2$  (8.32%),  $\text{Na}_2\text{O}$  (7.50%),  $\text{Fe}_2\text{O}_3$  (7.00%),  $\text{K}_2\text{O}$  (2.54%),  $\text{MgO}$  (1.07%). Due to different production processes, the RM used in this study had lower  $\text{Fe}_2\text{O}_3$  content and slightly higher  $\text{TiO}_2$  content compared to levels found in other studies [21–23].

The raw RM was first crushed and dried in an oven (DHG-9240A, Shanghai) at 105°C for 48 hours. The sample was sieved; particles passing through the 80 mesh were prepared for further use. Each 10 g prepared RM sample was washed with 500 ml doubly distilled water and filtered through a 0.45  $\mu\text{m}$  membrane to wash out adhering impurities. The washed RM was dried overnight at 105°C and again sieved through a 80 mesh sieve.

To continue the preparation, 10 g samples, each with a ratio of 0.6 part lanthanum from  $\text{LaCl}_3 \cdot 7\text{H}_2\text{O}$  (chemical pure grade) to 1 part of the sieved RM, were then mixed in a crucible with 30 ml doubly distilled water and fully stirred. The pH was adjusted to 6 using 0.1 M NaOH and 0.1 M HCl; pH was monitored with a pH meter (WTW340i, Germany). The sample was dried at 105°C over 24 hours. The solid was then cooled, crushed, collected, and activated in a muffle furnace (SX<sub>2</sub>-4-10, Tianjin) at a stable temperature of 400°C for 3 h. The resulting product was crushed, washed, dried, and sieved using the same step as before, resulting in La-RM that was ready for further use.

### Leaching metal test

In order to test the material leaching metals, a standard Chinese determination procedure (HJ 557–2009) was taken for La-RM. The prepared La-RM of 100 g was mixed with ultrapure water at a ratio of 1:10 in a 2L extraction flask, which was continuously vibrated in the coaxial shaker bath (7HZ-82, Changzhou) with 200 rpm for 8h at 25°C. Then, the supernatant was sampled and filtered by 0.45 $\mu\text{m}$  membrane after 16 hours' sedimentation. According to the composition of La-RM, the possible metal cations in the filtrate were analyzed.

### Adsorption studies

Batch experiments were used to investigate the Cr(VI) adsorption performance of La-RM. To establish the key operational parameters, we sequentially investigated the La-RM dose, and the effects of temperature, pH, initial Cr(VI) concentration, and contact time. The adsorption experiments were carried out in 150 ml flasks, in which a dose of 2.0–5.0 g/L of La-RM, and 100 ml of  $\text{K}_2\text{Cr}_2\text{O}_7$  with an initial Cr(VI) concentration of 40 mg/L were added. The mixture pH was adjusted to 7, and then the sample was placed in the shaker bath (7HZ-82, Changzhou) to mix at 150 rpm for 3 h at 25°C.

To explore the efficiency of Cr(VI) adsorption, tests investigating temperature ranges from 5–65°C, and pH levels ranging from 2 to 11. Initial Cr(VI) concentrations ranged from 10–140 mg/L to identify the maximum adsorption capacity. To establish the optimal contact time of the adsorption process, samples were collected from the flasks at 5–180 min intervals, with initial Cr(VI) concentrations of 10, 40, 70, and 100 mg/L. To study the effect of coexisting anions, solutions of six common ions ( $\text{F}^-$ ,  $\text{SO}_4^{2-}$ ,  $\text{CO}_3^{2-}$ ,  $\text{NO}_3^{2-}$ ,  $\text{PO}_4^{3-}$  and  $\text{Cl}^-$ ) with an initial concentration of 40 mg/L, were added to separate samples of 40 mg/L of Cr(VI). All experiments conducted in triplicate and in parallel; the mean value of the three measurements was used as the final result.

## Analytical methods and calculations

Surface morphologies and sample compositions were examined using scanning electron microscopy and energy dispersive spectroscopy (SEM; JSM-6400, JEOL Ltd., ZEISS). The X-ray diffraction (XRD) patterns were identified in the  $2\theta$  range of 15–65 using a diffractometer (D/max-RB, Rigaku) with Cu-K $\alpha$  radiation ( $\lambda = 1.54178 \text{ \AA}$ ). The scanning rate was 0.020 s/step. The samples were manually sieved, without any further disposal, to mitigate any effects of the preferred orientation distorting the observed diffraction patterns. Concentrations of Cr(VI) filtered through a 0.45  $\mu\text{m}$  membrane were measured using an ultraviolet spectrophotometer (UV-1200, Shanghai) based on the diphenylcarbohydrazide spectrophotometric method. Eq 1 was used to calculate the amount of Cr(VI) adsorbed per unit mass of adsorbent:

$$q_e = \frac{(C_i - C_e) \times V}{M} \quad (1)$$

Eq 2 was used to calculate the removal performance of Cr(VI) from wastewater:

$$\text{Cr(VI) Removal (\%)} = \frac{C_i - C_e}{C_i} \times 100 \quad (2)$$

In this expression,  $q_e$  is the quantity of Cr(VI) adsorbed (mg/g);  $C_i$  and  $C_e$  are the initial and final Cr(VI) concentrations (mg/L);  $V$  is the volume of the Cr(VI) (L);  $M$  is the mass of La-RM (g).

Kinetic models of pseudo-first-order (Eq 3) and pseudo-second-order (Eq 4) were expressed as:

$$\log(q_e - q_t) = \log q_e - \frac{k_1}{2.303} t \quad (3)$$

$$\frac{t}{q_t} = \frac{1}{K_2 q_e^2} + \frac{1}{q_e} t \quad (4)$$

In these equations,  $q_e$  and  $q_t$  are the amount of Cr(VI) adsorbed on La-RM, at equilibrium and over a given time (mg/g);  $t$  is the contact time (min); and  $k_1$  (1/min) and  $k_2$  (g/(mg·min)) are the adsorption rate constants for the pseudo-first-order and pseudo-second-order kinetic models.

The Langmuir (Eq 5) and Freundlich (Eq 6) adsorption models were used:

$$\frac{C_e}{q_e} = \frac{1}{K_L q_m} + \frac{C_e}{q_m} \quad (5)$$

$$\log q_e = \log K_F + \frac{1}{n} \log C_e \quad (6)$$

In these equations,  $C_e$  is the concentration of Cr(VI) solution at equilibrium (mg/L);  $q_e$  is the corresponding adsorption capacity (mg/g);  $K_L$  is the constant of Langmuir model related to the free energy of adsorption (L/mg);  $q_m$  is the mono-layer adsorption capacity of La-RM (mg/g);  $K_F$  is the constant of Freundlich model (L/g);  $1/n$  is the heterogeneity factor of the adsorbent related to the adsorption process.

The Gibbs free energy ( $\Delta G^\circ$ ), enthalpy ( $\Delta H^\circ$ ), and entropy ( $\Delta S^\circ$ ) were calculated to evaluate the thermodynamic nature of the adsorption process, using the following equations:

$$\Delta G^\circ = -RT \ln K \tag{7}$$

$$\ln K = \frac{\Delta S^\circ}{R} - \frac{\Delta H^\circ}{RT} \tag{8}$$

$$\Delta G^\circ = \Delta H^\circ - T\Delta S^\circ \tag{9}$$

In these expressions,  $R$  is the ideal gas constant ( $8.314 \text{ J mol}^{-1} \text{ K}^{-1}$ );  $T$  is the temperature (K); and  $K$  is the sorption equilibrium constant of the adsorption process, calculated between the solid and liquid phases at equilibrium [19].

The grain size of the RM was calculated using Sherrer equation:

$$D = 0.89\lambda / B \cos \theta \tag{10}$$

In this expression,  $D$  is the grain size;  $B$  is the broadening of diffraction line measured at half its maximum intensity;  $\lambda = 1.5418 \text{ \AA}$  is the wavelength of the Cu- $k_\alpha$  X-ray; and  $\theta$  is the Bragg angle.

## Results and Discussion

### Leaching metals of La-RM

Leaching metals of prepared La-RM were determined (Table 1). The toxic metal cations in leaching liquid contain Cr, Ni, Pb, Ti, Mn, Zn and Cu. All these toxic metal concentrations were far less than the requirements of the standards for drinking water quality of China (GB 5749–2006). Even the major elements of Ca and Al are also found less than the standard quality values in GB 5749–2006. The leaching La was only 5.984 mg/L, which could be induced by uncombined La in the surface of RM. There are not any available reports indicating La could induce the toxicity to human beings or plants. Therefore, the data of leaching metals showed the safety of using La-RM in the aqueous environment. Li H N et al also reported that cobalt doped red mud was stable and toxicity free when it was used for catalytic ozonation of bezafibrate in wastewater [24]. Thus, La-RM will not cause secondary pollution.

### Effects of operational conditions on Cr(VI) adsorption

To find the optimal dosage, different amounts of La-RM were tested, ranging from 2.0–5.0 g/L. As Fig 1(A) shows, an increased adsorbent dose leads to increases in Cr(VI) removal efficiency and adsorption capacity. The increased adsorbent had greater surface area and more binding sites available for the Cr(VI) [25]. The smooth curve indicates that the sample was homogeneous. As the La-RM dose increased, the rising rate of Cr(VI) removal decreased. This is due to the split in the flux, or the concentration gradient, between solute concentration in the solution

**Table 1. Leaching metals concentrations comparing with Chinese national drinking water quality standards.**

|                     | Mg    | Al    | Ca   | Cu    | Cr    | Zn    | Ni    | Pb    | Ti    | Mn    | La    |
|---------------------|-------|-------|------|-------|-------|-------|-------|-------|-------|-------|-------|
| La-RM (mg/L)        | 0.032 | 0.138 | 3.48 | 0.082 | 0.003 | 0.048 | 0.009 | 0.003 | 0.004 | 0.002 | 5.984 |
| GB 5749–2006 (mg/L) | -     | 0.2   | 450  | 1.0   | 0.05  | 1.0   | 0.02  | 0.01  | -     | 0.1   | -     |

“-” means not required.

doi:10.1371/journal.pone.0161780.t001

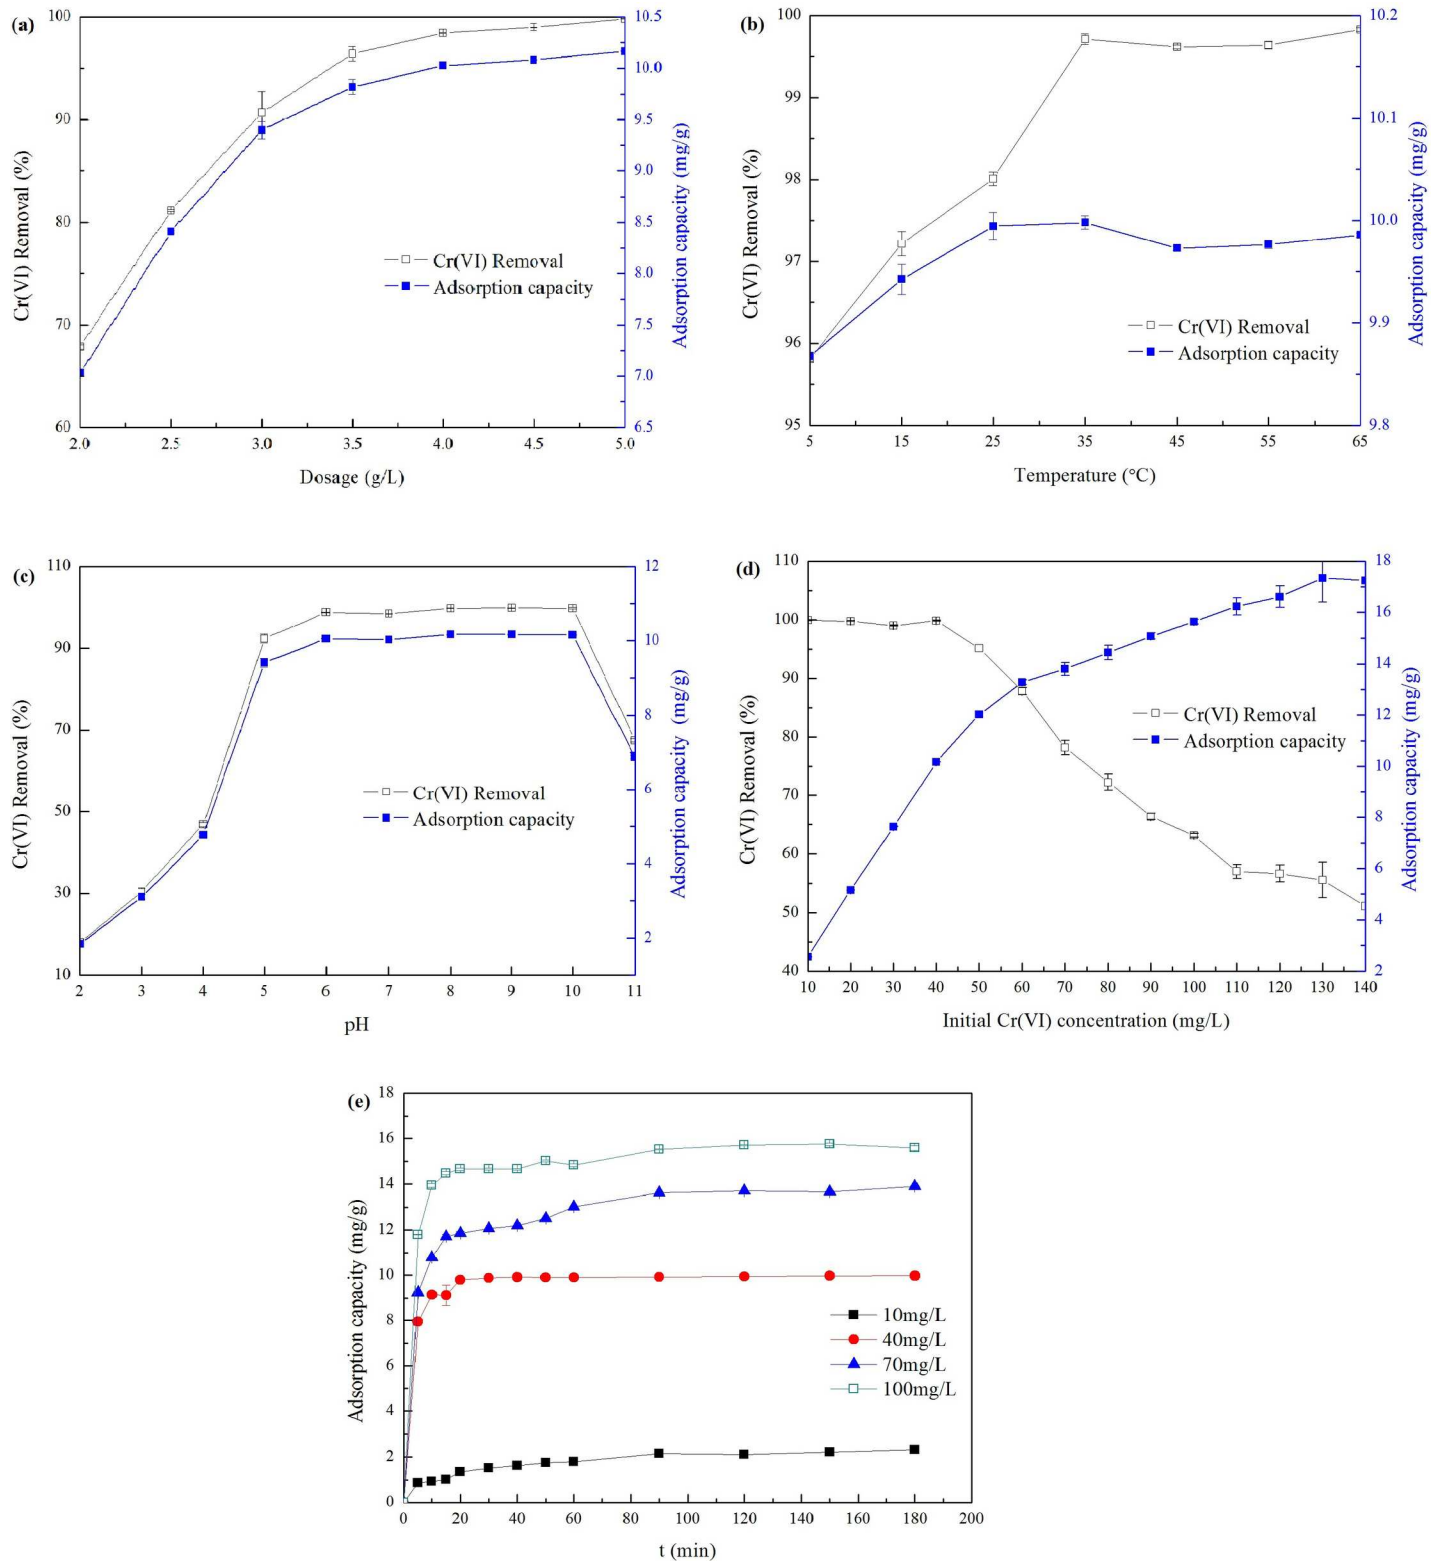

**Fig 1. Effects of some operational conditions on Cr(VI) removal and adsorption capacity.** (a) The effect of dose (temperature = 25°C, pH = 7, Cr(VI) concentration = 40 mg/L, time = 3 h); (b) The effect of temperature (dosage = 4 g/L, pH = 7, Cr(VI) concentration = 40 mg/L, time = 3 h); (c) The effect of pH (dosage = 4 g/L, temperature = 25°C, Cr(VI) concentration = 40 mg/L, time = 3 h); (d) The effect of initial Cr(VI) concentration (dosage = 4 g/L, temperature = 25°C, pH = 7, time = 3 h); (e) The effect of contact time (dosage = 4 g/L, temperature = 25°C, pH = 7, Cr(VI) concentration = 40 mg/L).

doi:10.1371/journal.pone.0161780.g001



and on the adsorbent's surface [26]. When the La-RM dose was 4.0 g/L, adsorption efficiency didn't increase. As such, the following experiments were conducted at this adsorbent dose.

The effect of temperature usually relates to the endothermic or exothermic nature of the adsorption reaction. Fig 1(B) shows the Cr(VI) adsorption in the temperature range of 5°C to 65°C. The Cr(VI) removal efficiency and adsorption capacity increased as the temperature rose from 5°C to 35°C, indicating endothermic adsorption. At temperature of 5°C, the Cr(VI) removal efficiency was 95.8%. A temperature increase improved the Cr(VI) adsorption capacity, resulting in 99.8% Cr(VI) removal efficiency at 35°C. There was no obvious increase in Cr(VI) removal efficiency and adsorption capacity above 35°C, which may be due to the limited number of active sites on the adsorbent. The wastewater temperature used in many Cr(VI)-producing industries, including leather tanning, plating, electroplating, anodizing baths, and rinse waters, ranges from 5–40°C [2]. This result highlights the wide temperature adaptability of La-RM for adsorbing Cr(VI), offering advantages for further industrial treatment applications.

Fig 1(C) shows the Cr(VI) removal as the pH ranged from 2 to 11. Cr(VI) adsorption was highly efficient at solution pH values ranging 5 to 10. Optimal adsorption conditions occurred at a pH of 9, with Cr(VI) removal exceeding 99%. Cr(VI) adsorption was lower below a pH of 5. The pH dependence of Cr(VI) adsorption is attributed to the pH-dependent equilibria expressed by  $\text{HCr}_2\text{O}_7^-$ ,  $\text{Cr}_2\text{O}_7^{2-}$  and  $\text{CrO}_4^{2-}$  [27].  $\text{Cr}_2\text{O}_7^{2-}$  and  $\text{HCrO}_4^-$  are the main ions at a pH range of 2–6, while  $\text{CrO}_4^{2-}$  dominates at pH values greater than 8. Generally,  $\text{Cr}_2\text{O}_7^{2-}$  and  $\text{CrO}_4^{2-}$  tend to form substances that are difficult to dissolve in water, but are easily dissolved by acid. This means that some stable structures may form in the La-RM with Cr(VI), but do not exist in a strongly acidic environment. The decrease in Cr(VI) removal when pH was above 10 may be caused by the competitive adsorption of  $\text{OH}^-$ . To study the maximum adsorption capacity of La-RM, the following experiments were conducted at a pH of 9.

As Fig 1(D) shows, the initial concentration of Cr(VI) ranged from 10 to 130 mg/L; at these levels, Cr(VI) adsorption increased from 2.57 mg/g to a maximum of 17.35 mg/g. This result shows the effective enhancement of adsorption capability by La, because pure RM has a low Cr(VI) adsorption capability of 0.003 mg/g [18]. At initial concentrations between 10 and 40 mg/L, the linear increase in adsorption capacity was caused by the relative abundance of adsorbent, where all the Cr(VI) can be removed with over 99% removal efficiency. The dynamic trend of the adsorption capacity curve, with initial Cr(VI) concentrations of 40–140 mg/L, was similar to the trend of the adsorption capacity variation with adsorbent dosages (Fig 1(A)). This indicated that the adsorption sites were not abundant when compared to the Cr(VI) concentration. Therefore, although the increased Cr(VI) concentration enhanced adsorption capacity, the Cr(VI) removal efficiency also continuously decreased.

Adsorption experiments were conducted over 180 min to identify the optimum contact time. Fig 1(E) shows the adsorption capacity as a result of different initial concentrations of 10, 40, 70 and 100 mg/L. In the first 10 min, the La-RM experienced fast adsorption kinetics and high Cr(VI) removal. The rapid adsorption during the initial contact time can be attributed to the large number of vacant adsorbent sites and the high solute concentration gradient [28]. As more and more active sites disappeared, slow adsorption rates occurred between 10 and 90 min. The equilibrium point of approximately 90 min occurred in all experiments at initial Cr(VI) concentrations ranging from 10–100 mg/L. Therefore, all adsorption experiments reached equilibrium in 3 hours, similar to other experiments using red mud [29].

### Effect of coexisting ions on adsorption

The effect of different competitive ions, such as  $\text{F}^-$ ,  $\text{SO}_4^{2-}$ ,  $\text{CO}_3^{2-}$ ,  $\text{NO}_3^{2-}$ ,  $\text{PO}_4^{3-}$  and  $\text{Cl}^-$ , on Cr(VI) removal was studied at the initial Cr(VI) concentration of 40 mg/L. As Fig 2 shows, the

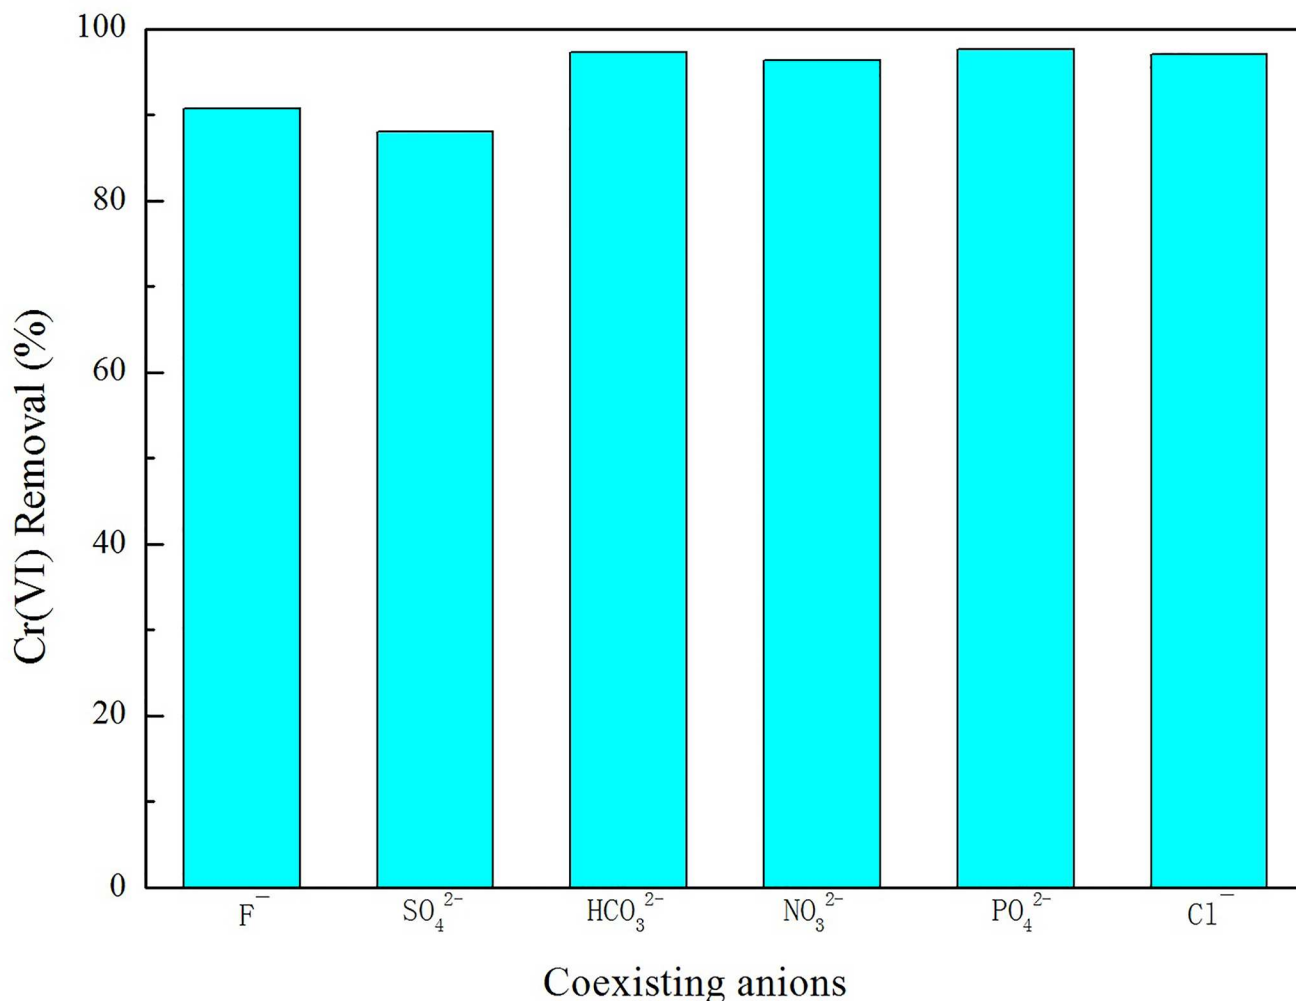

**Fig 2. The effect of coexisting anions on Cr(VI) removal.**

doi:10.1371/journal.pone.0161780.g002

removal efficiency of Cr(VI) decreased to approximately 88% (with  $\text{SO}_4^{2-}$ ) and 91% (with  $\text{F}^-$ ) compared to the suspension with no additional ions. When studying the other ions, the removal efficiency remained at approximately 97%.  $\text{SO}_4^{2-}$  influenced the adsorption capacity of the coexisting anions more than  $\text{F}^-$ , which was higher than  $\text{NO}_3^{2-}$ ,  $\text{Cl}^-$ ,  $\text{CO}_3^{2-}$ , and  $\text{PO}_4^{3-}$ .

Although coexisting anions affect the La-RM, Cr(VI) removal remained high, indicating the strong selective adsorption of Cr(VI). In real industrial wastewater, there may be more competitive ions and impurities, such as dyes (with cadmium and zinc), nitrate and sulfate salts, surfactants, sulfide, and formaldehyde in textile industry wastewater [30]; and concentrations of iron, copper, zinc, chromium and nickel with high concentrations of acids, sulfate, and  $\text{Cl}^-$  ions in electroplating wastewater [31]. As such, practical application of La-RM requires further investigation with different types of wastewater.

### Adsorption kinetics

Fig 3 shows the pseudo-first-order (a) plot of  $\log(q_e - q_t)$  against  $t$  and the pseudo-second-order (b) plot of  $t/q_t$  against  $t$  at the different initial Cr(VI) concentrations. Table 2 presents the calculated kinetic parameters including the regression coefficient ( $R^2$ ) of pseudo-first-order and



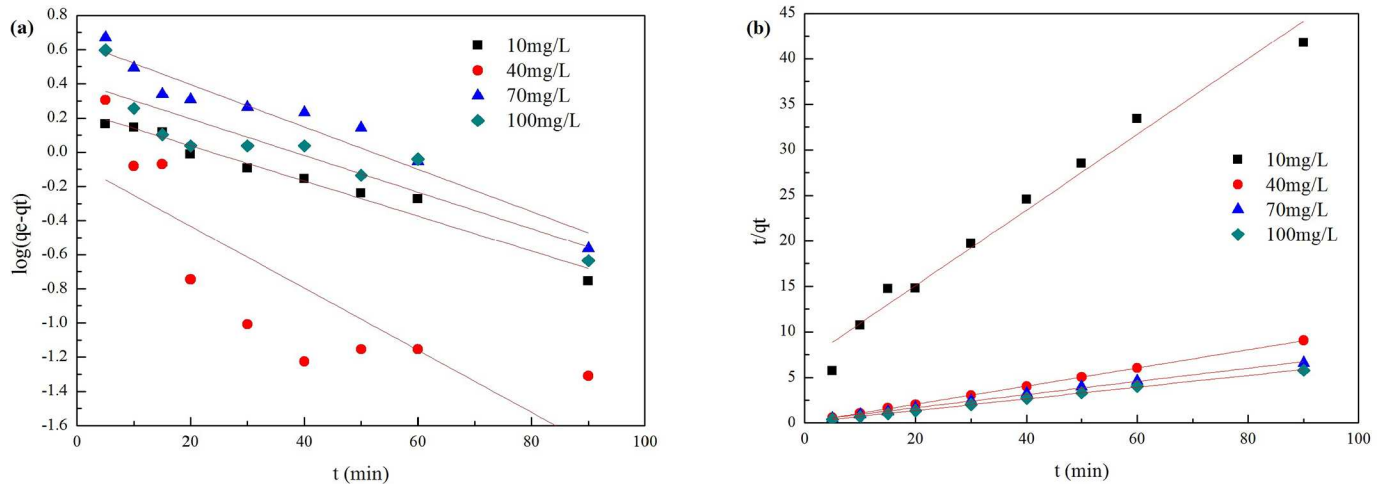

**Fig 3. Adsorption kinetics of Cr(VI) on La-RM.** (a) Pseudo-first-order kinetic model for Cr(VI) adsorption; (b) Pseudo-second-order kinetic model for Cr(VI) adsorption.

doi:10.1371/journal.pone.0161780.g003

pseudo-second-order kinetic models. The adsorption kinetic data recorded by the pseudo-second-order ( $R^2 \geq 0.9777$ ) model fit better than the pseudo-first-order model ( $R^2 \leq 0.9677$ ) in the initial 10–100 mg/L concentration range. The pseudo-second-order model assumes a monolayer adsorption system, and that the adsorption mechanism is determined by chemisorption, not physisorption [32]. The maximum adsorption capacities ( $q_m$ ) in the initial 10–100 mg/L concentration range calculated by this model match the experimental data well (Fig 1(D)).

### Adsorption isotherms

The equilibrium data were fit to the adsorption isotherms to determine the adsorption capacity and potential for Cr(VI) adsorption. Fig 4 presents the Langmuir plot of  $C_e$  versus  $C_e/q_e$  and the Freundlich plot of  $\log C_e$  to  $\log q_e$  for the adsorption data. Table 3 shows the relative parameters calculated from the plots. The high regression coefficient 0.9965 of the Langmuir isotherm, compared with the slightly lower 0.9691 of the Freundlich isotherm, suggests that Cr(VI) adsorption on La-RM fit well on the Langmuir isotherm. Previously, Cr(VI) adsorption was also investigated against a Langmuir isotherm using activated carbon prepared from longan seed (LSAC) [33] and magnetic chitosan nanoparticles [34]. This is consistent with our results. In the Langmuir isotherm model, the adsorption process is assumed to be a monolayer on a uniform surface, with limited adsorption sites [35]. This suggests there is a maximum adsorption capacity,  $q_m$ , calculated as 16.5810 mg/g. This value is close to the experimental value of 17.35 mg/g. Some novel adsorbents were prepared for Cr(VI) removal from liquids in recent years, which showed the different adsorption capacity (Table 4). Comparing with these

**Table 2. The pseudo-first-order and pseudo-second-order kinetic parameters.**

| Cr(VI)   | Pseudo-first-order |        |        | Pseudo-second-order model |         |        |
|----------|--------------------|--------|--------|---------------------------|---------|--------|
|          | $k_1$              | $q_m$  | $R^2$  | $k_2$                     | $q_m$   | $R^2$  |
| 10 mg/L  | 0.0237             | 1.7495 | 0.9677 | 0.0254                    | 2.4078  | 0.9777 |
| 40 mg/L  | 0.0418             | 0.8506 | 0.6794 | 0.1014                    | 10.0685 | 0.9998 |
| 70 mg/L  | 0.0285             | 4.4025 | 0.9383 | 0.0201                    | 13.8696 | 0.9977 |
| 100 mg/L | 0.0247             | 2.5694 | 0.8176 | 0.0388                    | 15.5788 | 0.9992 |

doi:10.1371/journal.pone.0161780.t002

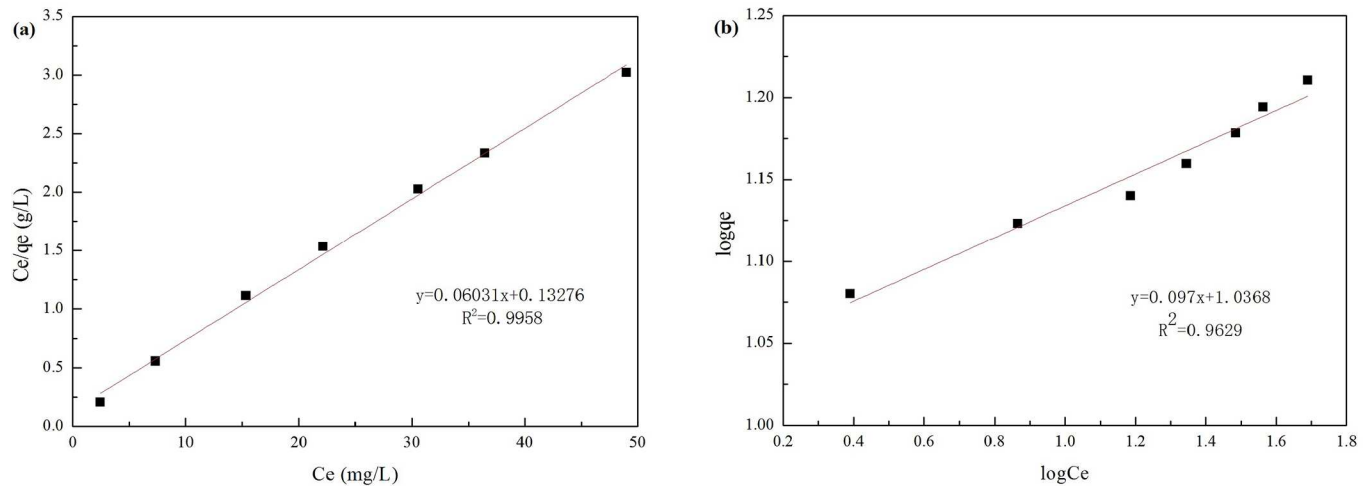

**Fig 4. Adsorption isotherms of Cr(VI) on La-RM.** (a) Langmuir isotherm model for Cr(VI) adsorption; (b) Freundlich isotherm model for Cr(VI) adsorption.

doi:10.1371/journal.pone.0161780.g004

absorbents, La-RM prepared in this study showed the relatively high adsorption capacity, which indicated the potential prospects for application of Cr(VI) removal from wastewater.

### Thermodynamic study

The thermodynamic parameters were calculated using experimental data (Table 5). The negative  $\Delta G^\circ$  values indicate that the Cr(VI) adsorption on La-RM is spontaneous. As the temperature rises, the  $\Delta G^\circ$  value becomes more negative, indicating that the adsorption process becomes less favorable at higher temperatures. This agrees with the variability of Cr(VI) removal at different temperature (referring to Fig 1(B)). The positive  $\Delta H^\circ$  values suggest endothermic adsorption, consistent with the effect of temperature discussed above. The positive  $\Delta S^\circ$  revealed the increased disorderliness and randomness at the La-RM solid-solution interface.

### Surface characteristics of raw RM, La-RM and La-RM absorbed by Cr (VI)

The raw RM powders are composed of luster granules at the micrometer scale with no obvious pores (Fig 5(A)). The raw RM surface became rough after being modified with lanthanum. Many particles accumulate on the surface (Fig 5(B)). Table 6 presents the primary composition of RM and La-RM, as determined by energy dispersive spectroscopy in the top 1  $\mu\text{m}$  of the sample surface. Raw RM was composed of high amounts of Al, Si, and Ca. In La-RM, La content increased from 0 to 28.65% in weight and formed the main element. This demonstrates that the particle accumulation was due to the La. In the La-RM, Ca content decreased significantly, indicating that phase changes may have occurred during La-RM preparation. After adsorbing Cr(VI), the La-RM surface became rougher (Fig 5(C)). The sample surface changes

**Table 3. Langmuir and Freundlich isotherm parameters.**

| Langmuir |        |        | Freundlich |         |        |
|----------|--------|--------|------------|---------|--------|
| $q_m$    | $K_L$  | $R^2$  | $n$        | $K_f$   | $R^2$  |
| 16.5810  | 0.4543 | 0.9965 | 10.3093    | 10.8843 | 0.9691 |

doi:10.1371/journal.pone.0161780.t003

**Table 4. Comparison of different adsorbents for Cr(VI) removal.**

| Adsorbent                                                                | Adsorption capacity (mg/g) | Reference |
|--------------------------------------------------------------------------|----------------------------|-----------|
| Cetyltrimethylammonium bromide modified red mud                          | 22.20                      | [36]      |
| Polydopamine/MNP core/shell                                              | 9.725                      | [37]      |
| Activated alumina                                                        | 7.44                       | [38]      |
| Bio-char derived from wood chips                                         | 1.717                      | [39]      |
| $\alpha$ -Fe <sub>2</sub> O <sub>3</sub> nanofibers                      | 16.17                      | [40]      |
| A carbonaceous material obtained from the diesel engine exhaust mufflers | 11.494                     | [41]      |
| Red Mud modified by lanthanum                                            | 17.35                      | This work |

doi:10.1371/journal.pone.0161780.t004

indicated that new phases or crystals might form during the preparation and adsorption process. This deserves further investigation.

### Mechanism of Cr(VI) adsorption on La-RM

Adsorption data indicated that the La-RM adsorption of Cr(VI) occurred chemically on the surface. As such, the crystal composition was established using XRD (Fig 6). The powder XRD pattern shows that the main phases of the raw RM are katoite and cancrinite, as all the peaks are consistent with the standard references (JCPDS cards PDF#38–0368 and PDF#48–1862). Some peaks correspond to SiO<sub>2</sub> and Fe<sub>2</sub>O<sub>3</sub>, which are important components of RM (Table 6). The Al<sup>3+</sup> exists in the form of AlO(OH), rather than the Al(OH)<sub>3</sub> found in the raw RM. This may be because Al(OH)<sub>3</sub> could be annealed under 300°C after losing a H<sub>2</sub>O molecule at a high temperature.

After lanthanum modification, a diffraction pattern for tetragonal LaOCl was present. The peaks of (101) (110) (102) are sharp and clear, consistent with standard JCPDS card 73–2063 of LaOCl. In the meantime, the RM peak was weakened because it was coated by LaOCl; this was observed in the SEM images (Fig 5(B)). No obvious differences were found in the XRD pattern of La-RM after absorbing Cr(VI) from the wastewater compared with La-RM. This indicates that the crystal form transformation occurred after adsorbing Cr(VI). The LaOCl grain size in the La-RM is 25.6 nm. After the La-RM granule absorbed Cr(VI), granule size increased to 38.1 nm. These data suggest that the LaOCl could be responsible for Cr(VI) adsorption from the wastewater.

It has reported that complexation reaction could occur between La(OH)<sub>3</sub> and PO<sub>4</sub><sup>2-</sup> [42,43]. On the same reaction mode, As(VI) in the form of H<sub>2</sub>AsO<sub>4</sub><sup>-</sup> and HAsO<sub>4</sub><sup>2-</sup> were also found to react with La(OH)<sub>3</sub> [44]. LaOCl is reported to easily react with H<sub>2</sub>O to form hydrous La(OH)<sub>3</sub> at pH values greater than 3 [45]. So, it is reasonable to deduce that the same reaction mechanism could occur in our study. These possible reactions of La(OH)<sub>3</sub> with Cr(VI) radical are

**Table 5. Thermodynamic parameters for Cr(VI) adsorption onto La-RM.**

| T (°C) | ΔG° (KJ/mol) | ΔS° (J/mol) | ΔH° (KJ/mol) |
|--------|--------------|-------------|--------------|
| 5      | -4.0294      | 0.1694      | 43.239       |
| 15     | -5.1924      |             |              |
| 25     | -6.1903      |             |              |
| 35     | -10.7684     |             |              |
| 45     | -11.0449     |             |              |
| 55     | -11.5468     |             |              |
| 65     | -13.9866     |             |              |

doi:10.1371/journal.pone.0161780.t005

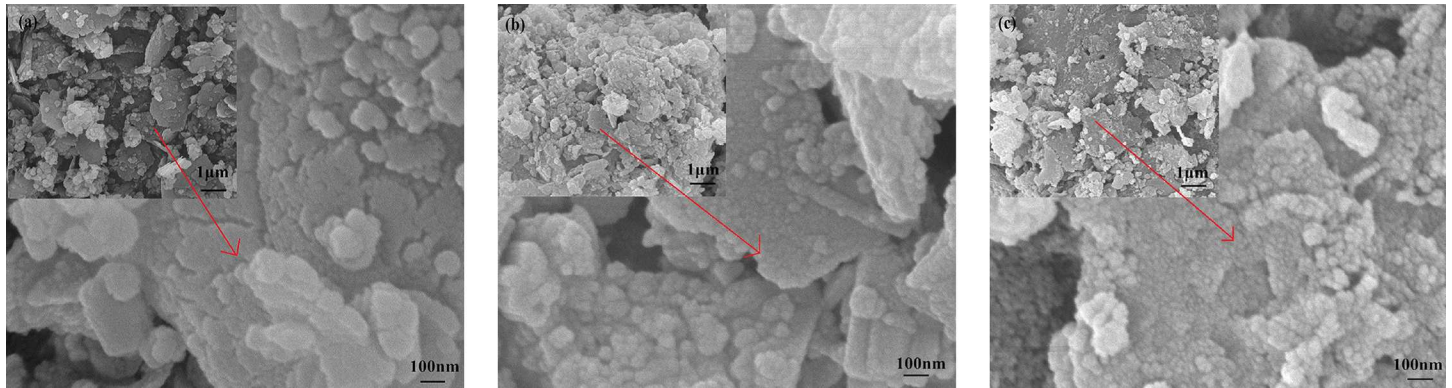

**Fig 5. SEM images.** (a) SEM image of raw RM; (b) SEM image of La-RM; (c) SEM image of La-RM adsorbed by Cr(VI).

doi:10.1371/journal.pone.0161780.g005

dependent on the solution pH (Eqs 12–14) [26].  $\text{La}(\text{OH})_3$  can exchange the with hydroxy to form different chemical compounds such as  $\equiv\text{La}-\text{CrO}_4$ ,  $\equiv\text{La}-\text{HCrO}_4$  and  $\equiv\text{La}-\text{Cr}_2\text{O}_7$  with stable valence bond under different pH solutions [46].

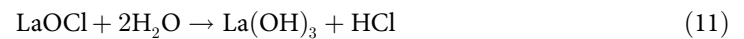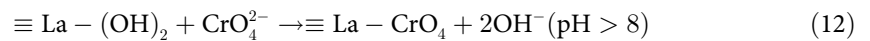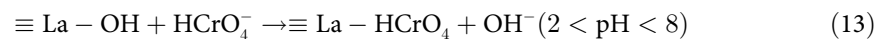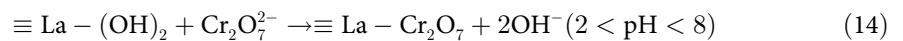

## Conclusion

This paper described Cr(VI) adsorption using a novel La-RM material; adsorption was positively associated with the La-RM dose, pH, temperature, and initial Cr(VI) concentration. The fast adsorption showed a maximum adsorption capacity of 17.35 mg/g; coexisting ions had little influence on that rate. The spontaneous and endothermic adsorption was a mono-layer system, following the Langmuir isotherm model and pseudo-second-order kinetic model. The La-

**Table 6. Composition of RM and La-RM**

| Element | RM    |       | La-RM |       |
|---------|-------|-------|-------|-------|
|         | Wt%   | At%   | Wt%   | At%   |
| O       | 36.32 | 53.59 | 23.14 | 45.68 |
| Na      | 5.55  | 5.69  | 0.89  | 1.22  |
| Mg      | 1.07  | 1.04  | 1.2   | 1.56  |
| Al      | 14.38 | 12.58 | 13.66 | 15.98 |
| Si      | 12.46 | 10.47 | 11.23 | 12.63 |
| K       | 2.11  | 1.28  | 2.51  | 2.03  |
| Ca      | 17.63 | 10.38 | 4.32  | 3.4   |
| Ti      | 4.99  | 2.46  | 2.72  | 1.79  |
| La      | 0     | 0     | 28.65 | 6.51  |
| Fe      | 4.9   | 2.07  | 2.28  | 1.29  |

doi:10.1371/journal.pone.0161780.t006

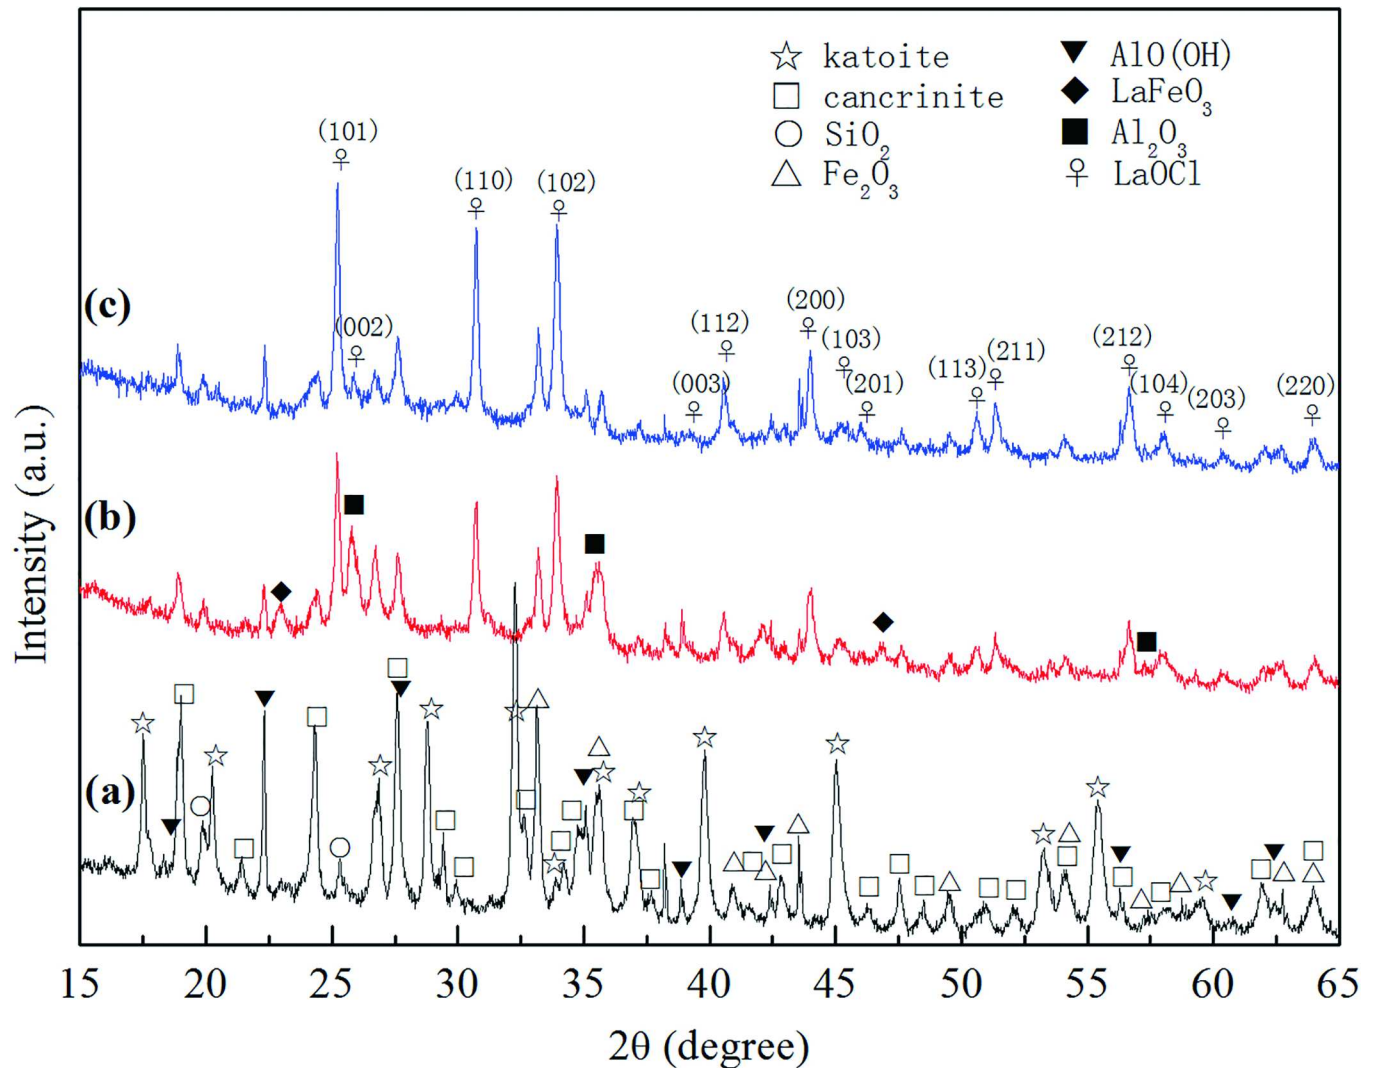

**Fig 6.** The powder XRD pattern of RM (line a), RM dropped by lanthanum (line b), and La-RM adsorbed by Cr(VI) (line c).

doi:10.1371/journal.pone.0161780.g006

RM adsorption relied on hydrous  $\text{La}(\text{OH})_3$ , which reacted with different forms of Cr(VI) in wide pH ranges in wastewater.

This study demonstrated that the novel La-RM supported Cr(VI) adsorption, providing an excellent way to reuse RM as a valuable material for wastewater treatment. The La modification enhances adoption capability. La is an inexpensive element in rare earth mines; as such, this study also presents a solution that may improve lanthanum application value. To avoid the pollution in the environment, further disposal of the chromium-attached La-RM or the recycle of Cr(VI) from the chromium-attached La-RM should be added as the necessary process for real wastewater treatment. Future research will focus on material regeneration and Cr(VI) recycle to expand engineering application.

### Supporting Information

**S1 File. Original data of Figs 1–4.**  
(DOC)

## Acknowledgments

This research was supported by the National Natural Science Foundation of China (Project No. 51478011 and No. 51178004), the Beijing Natural Science Foundation (Project No. 8132013).

## Author Contributions

**Conceptualization:** YC.

**Data curation:** YC YP.

**Formal analysis:** YC JL ZD.

**Funding acquisition:** YC.

**Investigation:** YC JL.

**Methodology:** YC.

**Project administration:** YC.

**Resources:** YC YP.

**Software:** YC JL ZD.

**Supervision:** YC.

**Validation:** YC JL ZD.

**Visualization:** YC JL.

**Writing – original draft:** YC JL ZD.

**Writing – review & editing:** YC JL.

## References

1. Muhammad M, Suthor V, Rafique E, Yasin M. Removal of Cd, Cr, and Pb from aqueous solution by unmodified and modified agricultural wastes. *Environ Monit Assess.* 2015; 187(2): 1–8. doi: [10.1007/s10661-014-4258-8](https://doi.org/10.1007/s10661-014-4258-8) PMID: [25626568](https://pubmed.ncbi.nlm.nih.gov/25626568/)
2. Liu Z, Wang G, Zhao X. Removal of Cr (VI) from aqueous solution using ultrafine coal fly ash. *J Wuhan Univ Technol.* 2010; 25(2): 323–327. doi: [10.1007/s11595-010-2323-x](https://doi.org/10.1007/s11595-010-2323-x)
3. Wang S, Tang Y, Li K, Mo Y, Li H, Gu Z. Combined performance of biochar sorption and magnetic separation processes for treatment of chromium-contained electroplating wastewater. *Bioresour Technol.* 2014; 174: 67–73. doi: [10.1016/j.biortech.2014.10.007](https://doi.org/10.1016/j.biortech.2014.10.007) <http://search.crossref.org/?q=Combined+performance+of+biochar+sorption+and+magnetic+separation+processes+for+treatment+of+chromium-contained+electroplating+wastewater> PMID: [25463783](https://pubmed.ncbi.nlm.nih.gov/25463783/)
4. Daoud W, Ebadi T, Fahimifar A. Optimization of hexavalent chromium removal from aqueous solution using acid-modified granular activated carbon as adsorbent through response surface methodology. *Korean J Chem Eng.* 2015; 32(6): 1119–1128. doi: [10.1007/s11814-014-0337-3](https://doi.org/10.1007/s11814-014-0337-3)
5. Owlad M, Aroua MK, Daud WAW, Baroutian S. Removal of Hexavalent Chromium-Contaminated Water and Wastewater: A Review. *Water Air Soil Poll.* 2009; 200(1–4): 59–77. doi: [10.1007/s11270-008-9893-7](https://doi.org/10.1007/s11270-008-9893-7)
6. Sharma SK, Petrusevski B, Amy G. Chromium removal from water: a review. *J Water Supply Res T.* 2008; 57(8): 541. doi: [10.2166/aqua.2008.080](https://doi.org/10.2166/aqua.2008.080)
7. S MS, M EAA, Chidambaram R. Isotherm Modelling, Kinetic Study and Optimization of Batch Parameters Using Response Surface Methodology for Effective Removal of Cr(VI) Using Fungal Biomass. *Plos One.* 2015; 10(3): 1–15. doi: [10.1371/journal.pone.0116884](https://doi.org/10.1371/journal.pone.0116884) PMID: [25786227](https://pubmed.ncbi.nlm.nih.gov/25786227/)



8. Ahmaruzzaman M. Industrial wastes as low-cost potential adsorbents for the treatment of wastewater laden with heavy metals. *Adv Colloid Interfac.* 2011; 166(1–2): 36–59. doi: [10.1016/j.cis.2011.04.005](https://doi.org/10.1016/j.cis.2011.04.005) PMID: [21669401](https://pubmed.ncbi.nlm.nih.gov/21669401/)
9. Tang L, Yang G, Zeng G, Cai Y, Li S, Zhou Y, et al. Synergistic effect of iron doped ordered mesoporous carbon on adsorption-coupled reduction of hexavalent chromium and the relative mechanism study. *Chem Eng J.* 2014; 239(1): 114–122. doi: [10.1016/j.cej.2013.10.104](https://doi.org/10.1016/j.cej.2013.10.104)
10. Wang S, Ang H M, Tadé M O. Novel applications of red mud as coagulant, adsorbent and catalyst for environmentally benign processes. *Chemosphere.* 2008; 72(11): 1621–1635. doi: [10.1016/j.chemosphere.2008.05.013](https://doi.org/10.1016/j.chemosphere.2008.05.013) PMID: [18558418](https://pubmed.ncbi.nlm.nih.gov/18558418/)
11. Kumar S, Kumar R, Bandopadhyay A. Innovative methodologies for the utilisation of wastes from metallurgical and allied industries. *Resour Conserv Recy.* 2006; 48(4): 301–314. doi: [10.1016/j.resconrec.2006.03.003](https://doi.org/10.1016/j.resconrec.2006.03.003)
12. Yi Z, Shibin X, Ji L, Yimin Z. Phosphate removal performance of acid pickling milling wastewater from high-phosphate hematite mineral processing by activated red mud. *Desalin Water Treat.* 2012; 20(1–3): 203–208. doi: [10.5004/dwt.2010.1387](https://doi.org/10.5004/dwt.2010.1387)
13. Cengeloglu Y, Kir E, Ersoz M. Removal of fluoride from aqueous solution by using red mud. *Sep Purif Technol.* 2002; 28(1): 81–86. doi: [10.1016/S1383-5866\(02\)00016-3](https://doi.org/10.1016/S1383-5866(02)00016-3)
14. Ma Y, Lin C, Jiang Y, Lu W, Si C, Liu Y. Competitive removal of water-borne copper, zinc and cadmium by a CaCO<sub>3</sub>-dominated red mud. *J Hazard Mater.* 2009; 172(2–3): 1288–1296. doi: [10.1016/j.jhazmat.2009.07.135](https://doi.org/10.1016/j.jhazmat.2009.07.135) PMID: [19713036](https://pubmed.ncbi.nlm.nih.gov/19713036/)
15. Genç-Fuhrman H, Tjell JC, Mcconchie D. Increasing the arsenate adsorption capacity of neutralized red mud (Bauxsol). *J Colloid Interf Sci.* 2004; 271(2): 313–320. doi: [10.1016/j.jcis.2003.10.011](https://doi.org/10.1016/j.jcis.2003.10.011) PMID: [14972607](https://pubmed.ncbi.nlm.nih.gov/14972607/)
16. Zhang L, Zhang H, Tian Y, Chen Z, Han L. Adsorption of methylene blue from aqueous solutions onto sintering process red mud. *Desalin Water Treat.* 2012; 47(1–3): 31–41. doi: [10.1080/19443994.2012.696412](https://doi.org/10.1080/19443994.2012.696412)
17. Bhatnagar A, Vilar V J, Botelho C M, Boaventura R A. A review of the use of red mud as adsorbent for the removal of toxic pollutants from water and wastewater. *Environ Technol.* 2011; 32(3–4): 231–249. doi: [10.1080/09593330.2011.560615](https://doi.org/10.1080/09593330.2011.560615) PMID: [21780692](https://pubmed.ncbi.nlm.nih.gov/21780692/)
18. Ma M, Lu Y, Chen R, Ma L, Wang Y. Hexavalent Chromium Removal from Water Using Heat-Acid Activated Red Mud. *Open Journal of Applied Sciences.* 2014; 4(5): 275–284. doi: [10.4236/ojapps.2014.45027](https://doi.org/10.4236/ojapps.2014.45027)
19. Huang W, Li D, Liu Z, Tao Q, Zhu Y, Yang J, et al. Kinetics, isotherm, thermodynamic, and adsorption mechanism studies of La(OH)<sub>3</sub>-modified exfoliated vermiculites as highly efficient phosphate adsorbents. *Chem Eng J.* 2014; 236(2): 191–201. doi: [10.1016/j.cej.2013.09.077](https://doi.org/10.1016/j.cej.2013.09.077)
20. Kamble SP, Jagtap S, Labhsetwar NK, Thakare D, Godfrey S, Devotta S, et al. Defluoridation of drinking water using chitin, chitosan and lanthanum-modified chitosan. *Chem Eng J.* 2007; 129(1–3): 173–180. doi: [10.1016/j.cej.2006.10.032](https://doi.org/10.1016/j.cej.2006.10.032)
21. Huang W, Wang S, Zhu Z, Li L, Yao X, Rudolph V, et al. Phosphate removal from wastewater using red mud. *J Hazard Mater.* 2008; 158(1): 35–42. doi: [10.1016/j.jhazmat.2008.01.061](https://doi.org/10.1016/j.jhazmat.2008.01.061) PMID: [18314264](https://pubmed.ncbi.nlm.nih.gov/18314264/)
22. Zhao Y, Zhang L, Ni F, Xi B, Xia X, Peng X, et al. Evaluation of a novel composite inorganic coagulant prepared by red mud for phosphate removal. *Desalination.* 2011; 273(2–3): 414–420. doi: [10.1016/j.desal.2011.01.065](https://doi.org/10.1016/j.desal.2011.01.065)
23. Zhao Y, Yue Q, Li Q, Li Q, Gao B, Han S, et al. Influence of sintering temperature on orthophosphate and pyrophosphate removal behaviors of red mud granular adsorbents (RMGA). *Colloid Surface A.* 2012; 394(2): 1–7. doi: [10.1016/j.colsurfa.2011.11.013](https://doi.org/10.1016/j.colsurfa.2011.11.013)
24. Li HN, Xu BB, Qi F, Sun DZ, Chen ZL. Degradation of bezafibrate in wastewater by catalytic ozonation with cobalt doped red mud: efficiency, intermediates and toxicity. *Appl Catal B-Environ.* 2014; 152–153(1): 342–351. doi: [10.1016/j.apcatb.2014.01.058](https://doi.org/10.1016/j.apcatb.2014.01.058)
25. Jie X, Zhe W, Shaoyong L, Deyi W, Zhenjia Z, Hainan K. Removal and recovery of phosphate from water by lanthanum hydroxide materials. *Chem Eng J.* 2014; 254(7): 163–170. doi: [10.1016/j.cej.2014.05.113](https://doi.org/10.1016/j.cej.2014.05.113)
26. Vadivelan V, Kumar KV. Equilibrium, kinetics, mechanism, and process design for the sorption of methylene blue onto rice husk. *J Colloid Interf Sci.* 2005; 286(1): 90–100. doi: [10.1016/j.jcis.2005.01.007](https://doi.org/10.1016/j.jcis.2005.01.007) PMID: [15848406](https://pubmed.ncbi.nlm.nih.gov/15848406/)
27. Dimos V, Haralambous KJ, Malamis S. A Review on the Recent Studies for Chromium Species Adsorption on Raw and Modified Natural Minerals. *Crit Rev Env Sci Tec.* 2012; 42(19): 1977–2016. doi: [10.1080/10643389.2011.574102](https://doi.org/10.1080/10643389.2011.574102)

28. Zhang L, Zhang H, Guo W, Tian Y. Removal of malachite green and crystal violet cationic dyes from aqueous solution using activated sintering process red mud. *Appl Clay Sci.* 2014; 93-94(5): 85–93. doi: [10.1016/j.clay.2014.03.004](https://doi.org/10.1016/j.clay.2014.03.004)
29. Pradhan J, Das SN, Thakur RS. Adsorption of Hexavalent Chromium from Aqueous Solution by Using Activated Red Mud. *J Colloid Interf Sci.* 1999; 217(1): 137–141. doi: [10.1006/jcis.1999.6288](https://doi.org/10.1006/jcis.1999.6288) PMID: [10441420](https://pubmed.ncbi.nlm.nih.gov/10441420/)
30. Cirik K, Dursun N, Sahinkaya E, Cinar Ö. Effect of electron donor source on the treatment of Cr(VI)-containing textile wastewater using sulfate-reducing fluidized bed reactors (FBRs). *Bioresource Technol.* 2013; 133(2): 414–420. doi: [10.1016/j.biortech.2013.01.064](https://doi.org/10.1016/j.biortech.2013.01.064) PMID: [23454387](https://pubmed.ncbi.nlm.nih.gov/23454387/)
31. Kul M, Oskay KO. Separation and recovery of valuable metals from real mix electroplating wastewater by solvent extraction. *Hydrometallurgy.* 2015; 155: 153–160. doi: [10.1016/j.hydromet.2015.04.021](https://doi.org/10.1016/j.hydromet.2015.04.021)
32. Lalley J, Han C, Li X, Dionysiou DD, Nadagouda MN. Phosphate adsorption using modified iron oxide-based sorbents in lake water: Kinetics, equilibrium, and column tests. *Chem Eng J.* 2016; 284: 1386–1396. doi: [10.1016/j.cej.2015.08.114](https://doi.org/10.1016/j.cej.2015.08.114)
33. Yang J, Yu M, Chen W. Adsorption of hexavalent chromium from aqueous solution by activated carbon prepared from longan seed: Kinetics, equilibrium and thermodynamics. *J Ind Eng Chem.* 2015; 21: 414–422. doi: [10.1016/j.jiec.2014.02.054](https://doi.org/10.1016/j.jiec.2014.02.054)
34. Thinh NN, Hanh PTB, Ha LTT, Anh LN, Hoang TV, Hoang VD, et al. Magnetic chitosan nanoparticles for removal of Cr(VI) from aqueous solution. *Mat Sci Eng: C.* 2013; 33(3): 1214–1218. doi: [10.1016/j.msec.2012.12.013](https://doi.org/10.1016/j.msec.2012.12.013) PMID: [23827563](https://pubmed.ncbi.nlm.nih.gov/23827563/)
35. Samuel MS, EA Abigail M, Ramalingam C. Biosorption of Cr(VI) by *Ceratocystis paradoxa* MSR2 Using Isotherm Modelling, Kinetic Study and Optimization of Batch Parameters Using Response Surface Methodology. *Plos One.* 2015; 10(3): 1–23. doi: [10.1371/journal.pone.0118999](https://doi.org/10.1371/journal.pone.0118999) PMID: [25822726](https://pubmed.ncbi.nlm.nih.gov/25822726/)
36. Li D, Ding Y, Li L, Chang Z, Rao Z, Lu L. Removal of hexavalent chromium by using red mud activated with cetyltrimethylammonium bromide. *Environ Technol.* 2015; 36(9–12): 1084–1090. doi: [10.1080/09593330.2014.975286](https://doi.org/10.1080/09593330.2014.975286) PMID: [25299348](https://pubmed.ncbi.nlm.nih.gov/25299348/)
37. Nematollahzadeh A, Seraj S, Mirzayi B. Catecholamine coated maghemite nanoparticles for the environmental remediation: Hexavalent chromium ions removal. *Chem Eng J.* 2015; 277: 21–29. doi: [10.1016/j.cej.2015.04.135](https://doi.org/10.1016/j.cej.2015.04.135)
38. Mor S, Ravindra K, Bishnoi NR. Adsorption of chromium from aqueous solution by activated alumina and activated charcoal. *Bioresour Technol.* 2007; 98(4): 954–957. doi: [10.1016/j.biortech.2006.03.018](https://doi.org/10.1016/j.biortech.2006.03.018) PMID: [16725320](https://pubmed.ncbi.nlm.nih.gov/16725320/)
39. Hyder AH, Begum SA, Egiebor NO. Sorption studies of Cr(VI) from aqueous solution using bio-char as an adsorbent. *Water Sci Technol.* 2014; 69(11): 2265. doi: [10.2166/wst.2014.143](https://doi.org/10.2166/wst.2014.143) PMID: [24901621](https://pubmed.ncbi.nlm.nih.gov/24901621/)
40. Ren TY, He P, Niu WL, Wu YJ, Ai LH, Gou XL. Synthesis of  $\alpha$ -Fe<sub>2</sub>O<sub>3</sub> nanofibers for applications in removal and recovery of Cr(VI) from wastewater. *Environ Sci and Pollu R.* 2013; 20(1): 155–162. doi: [10.1007/s11356-012-0842-z](https://doi.org/10.1007/s11356-012-0842-z)
41. Hussain S, Gul S, Khan S, Ur Rehman H. Retention studies of chromium (VI) from aqueous solution on the surface of a novel carbonaceous material. *Arab J Geosci.* 2013; 6(11): 4547–4556. doi: [10.1007/s12517-012-0745-9](https://doi.org/10.1007/s12517-012-0745-9)
42. Xie J, Lin Y, Li CJ, Wu DY, Kong HN. Removal and recovery of phosphate from water by activated aluminum oxide and lanthanum oxide. *Powder Technol.* 2015; 269(4): 351–357. doi: [10.1016/j.powtec.2014.09.024](https://doi.org/10.1016/j.powtec.2014.09.024)
43. Chen N, Feng CP, Zhang ZY, Liu RP, Gao Y, Li M, et al. Preparation and characterization of lanthanum (III) loaded granular ceramic for phosphorus adsorption from aqueous solution. *J Taiwan Inst Chem E.* 2012; 43(5): 783–789. doi: [10.1016/j.jtice.2012.04.003](https://doi.org/10.1016/j.jtice.2012.04.003)
44. Tokunaga S, Wasay SA, Park SW. Removal of arsenic(V) ion from aqueous solutions by lanthanum compounds. *Water Sci Technol.* 1997; 35(7): 71–78. doi: [10.1016/S0273-1223\(97\)00116-9](https://doi.org/10.1016/S0273-1223(97)00116-9)
45. Lee S, Byeon S. Transformation behavior of layered LaOCl to La(OH)<sub>3</sub> nanostructures in water. *Mat Sci Eng: B.* 2006; 133(1–3): 77–83. doi: [10.1016/j.mseb.2006.05.004](https://doi.org/10.1016/j.mseb.2006.05.004)
46. Konno H, Tachikawa H, Furusaki A, Furuichi R. Characterization of lanthanum(III) chromium(V) tetraoxide by X-Ray photoelectron spectroscopy. *Analytical sciences.* 1992; 8(5):641–646. doi: [10.2116/analsci.8.641](https://doi.org/10.2116/analsci.8.641)
